# Supplementary material for: Development of an ultra-sensitive para-nitrophenol sensor using tri-metallic oxide MoO2·Fe3O4·CuO nanocomposites
Source: Royal Society of Chemistry journal article supplement (doi:10.1039/d0ma00629g), 2020-01-01
Supplement: d0ma00629g1.pdf [file d0ma00629g1.pdf]

## Supplementary Materials

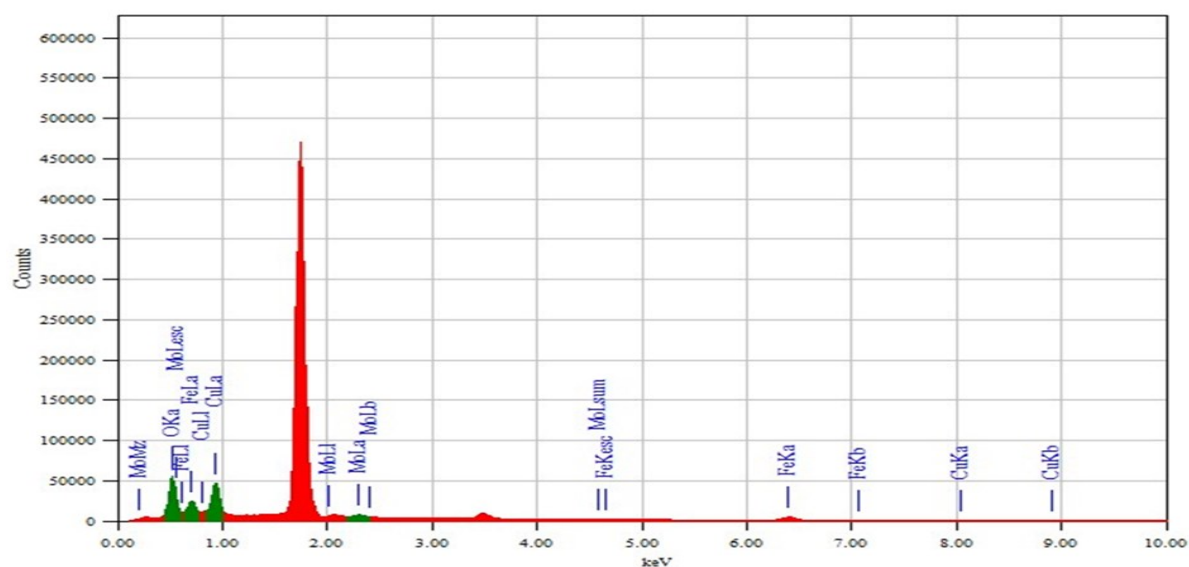

Fig. S1: EDS data of the nanocomposite,  $\text{MoO}_2 \cdot \text{Fe}_3\text{O}_4 \cdot \text{CuO}$

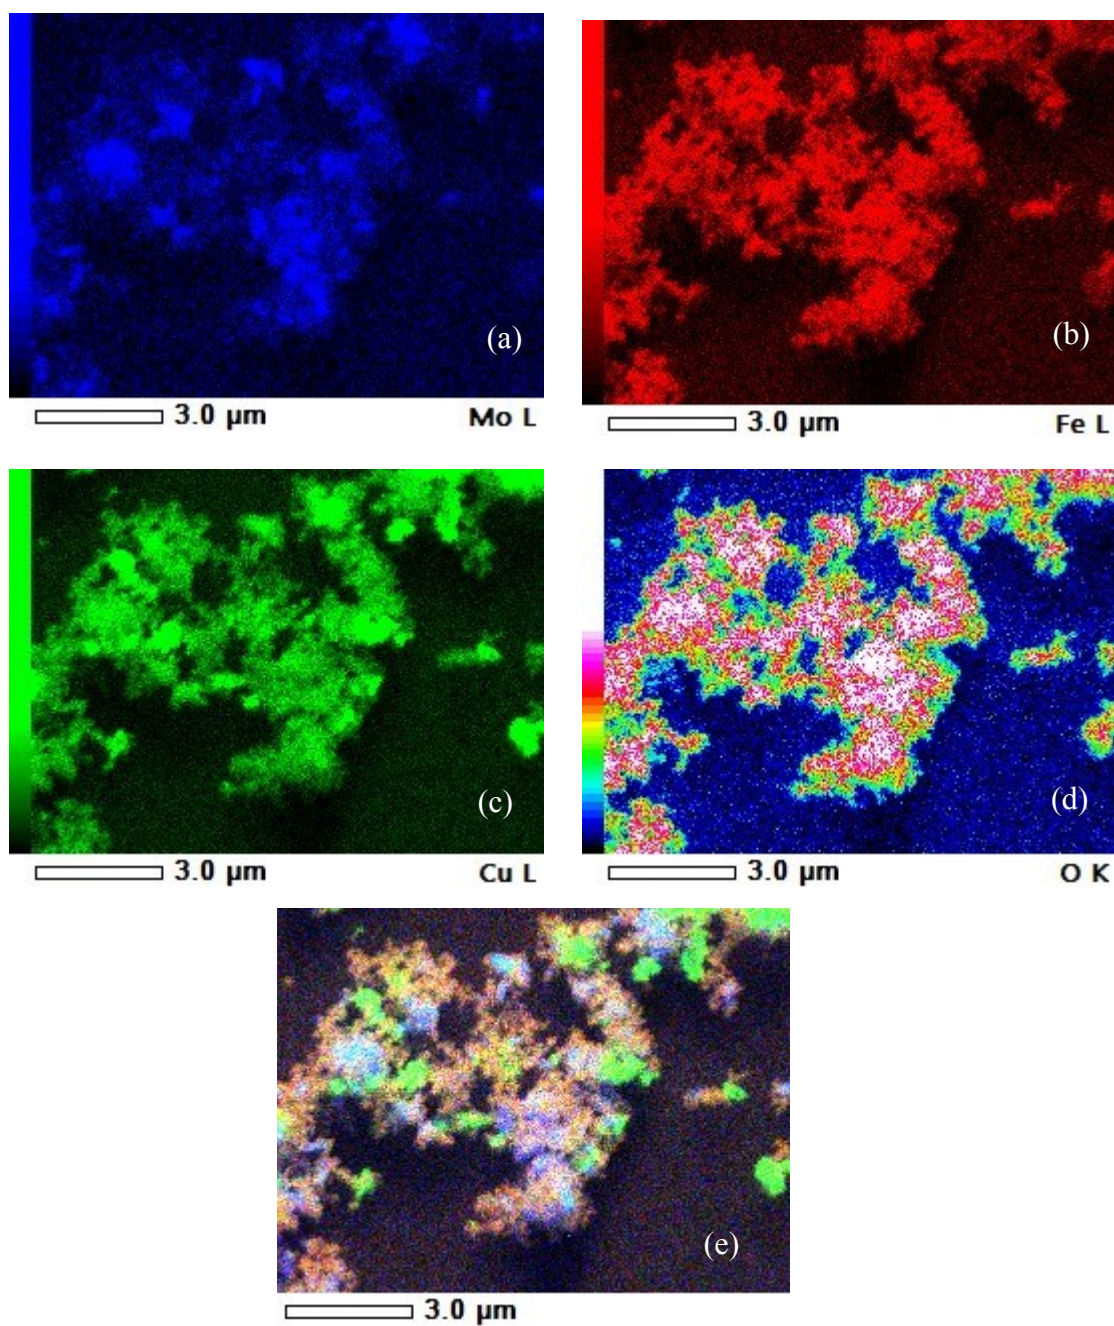

Fig. S2: SEM-EDS mapping of  $\text{MoO}_2 \cdot \text{Fe}_3\text{O}_4 \cdot \text{CuO}$  (a) Molebdenum, (b)Iron, (c) Copper, (d) Oxygen, and (e) is the Overlap of all of them

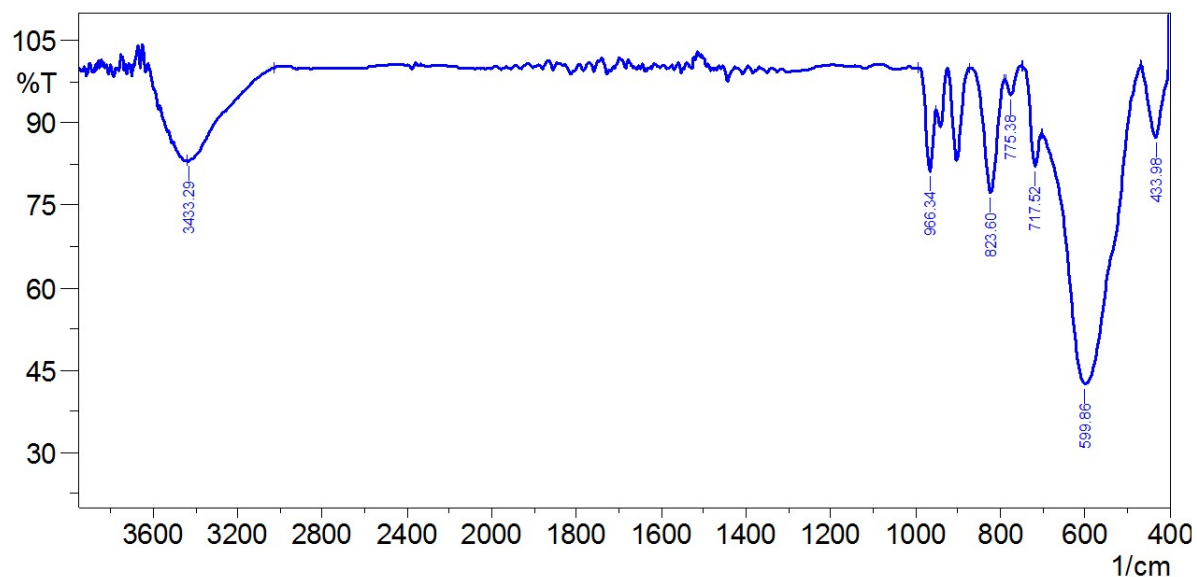

Fig. S3: FTIR spectra of synthesized nanocomposite,  $\text{MoO}_2 \cdot \text{Fe}_3\text{O}_4 \cdot \text{CuO}$

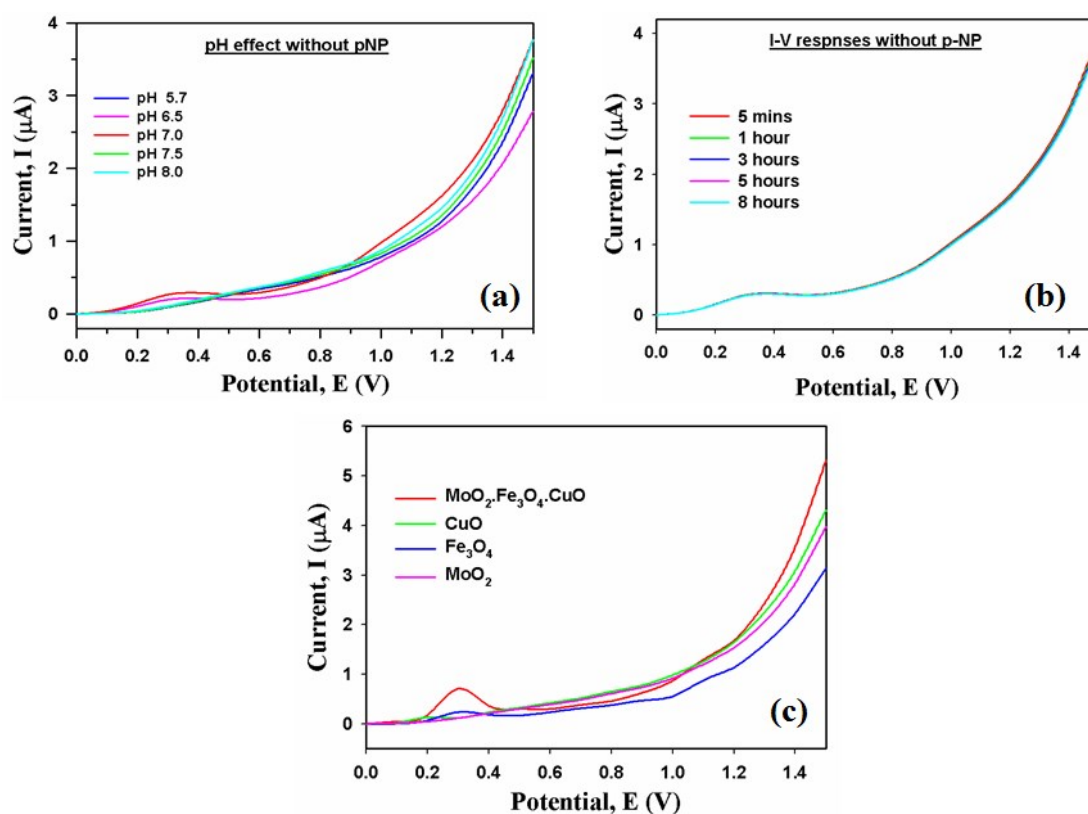

Fig. S4. Optimization of sensor in absence of target p-NP in identical conditions by electrochemical method. (a) The signal intensities of the  $\text{MoO}_2 \cdot \text{Fe}_3\text{O}_4 \cdot \text{CuO}$ /GCE sensor probe at different pH values (Absence of p-NP); (b) The signal intensities of the  $\text{MoO}_2 \cdot \text{Fe}_3\text{O}_4 \cdot \text{CuO}$ /GCE sensor probe at different times (Absence of p-NP), and (c)

Various single metal oxides (CuO, Fe<sub>3</sub>O<sub>4</sub>, and MoO<sub>2</sub>) comparative tests were investigated in identical conditions.

Table S1: EDS data of MoO<sub>2</sub>·Fe<sub>3</sub>O<sub>4</sub>·CuO

| Element | (keV) | Mass% | Sigma | Atom% | K       |
|---------|-------|-------|-------|-------|---------|
| O K     | 0.525 | 22.22 | 0.05  | 51.85 | 31.3547 |
| Fe L    | 0.705 | 46.15 | 0.2   | 30.85 | 36.1367 |
| Cu L    | 0.93  | 25.2  | 0.08  | 14.8  | 26.8511 |
| Mo L    | 2.293 | 6.43  | 0.06  | 2.5   | 5.6575  |
| Total   |       | 100   |       | 100   |         |
